# Supplementary material for: Probing growth of metal–organic frameworks with X-ray scattering and vibrational spectroscopy
Source: Royal Society of Chemistry journal article supplement (doi:10.1039/d2cp04375k), 2022-01-01
Supplement: d2cp04375k1.pdf [file d2cp04375k1.pdf]

## Supporting Information

### **Probing Growth of Metal–Organic Frameworks with X-Ray Scattering and Vibrational Spectroscopy**

Wenchao Lu,<sup>1</sup> Emily Zhang,<sup>1,2</sup> Jin Qian,<sup>1</sup> Chaya Weeraratna,<sup>1</sup> Megan N. Jackson,<sup>2</sup> Chenhui Zhu,<sup>4</sup> Jeffrey R. Long,<sup>2,3,5</sup> and Musahid Ahmed.<sup>1,\*</sup>

<sup>1</sup> Chemical Sciences Division, Lawrence Berkeley National Laboratory, Berkeley, CA 94720, USA

<sup>2</sup> Department of Chemistry, University of California, Berkeley, CA 94720, USA

<sup>3</sup> Material Sciences Division, Lawrence Berkeley National Laboratory, Berkeley, CA 94720, USA

<sup>4</sup> Advanced Light Source, Lawrence Berkeley National Laboratory, Berkeley, CA 94720, USA

<sup>5</sup>Department of Chemical and Biomolecular Engineering, University of California, Berkeley, Berkeley, California 94720, United States

**Table S1** Summary of IR vibrational modes from plane wave density functional theory. The modes with a relatively strong calculated IR intensity ( $> 0.35$  a.u.) are marked in bold with the corresponding vibrational modes visualized by VESTA.<sup>1</sup>

| Mode       | IR Frequency ( $\text{cm}^{-1}$ ) | IR Intensity (a.u.) | IR modes                                                                                                                                                                                    |
|------------|-----------------------------------|---------------------|---------------------------------------------------------------------------------------------------------------------------------------------------------------------------------------------|
| 159        | 44.89939562                       | 0.00012884          |                                                                                                                                                                                             |
| 158        | 69.89106867                       | 0.00098276          |                                                                                                                                                                                             |
| 157        | 91.90093685                       | 0.00493982          |                                                                                                                                                                                             |
| 156        | 99.88233883                       | 0.00570798          |                                                                                                                                                                                             |
| 155        | 100.7515809                       | 0.01115111          |                                                                                                                                                                                             |
| 154        | 104.8097617                       | 0.00187897          |                                                                                                                                                                                             |
| 153        | 107.7318572                       | 0.02950086          |                                                                                                                                                                                             |
| 152        | 110.8425595                       | 0.00242511          |                                                                                                                                                                                             |
| 151        | 119.96009                         | 0.00907427          |                                                                                                                                                                                             |
| 150        | 125.4913263                       | 0.02762092          |                                                                                                                                                                                             |
| 149        | 127.747235                        | 0.01450917          |                                                                                                                                                                                             |
| 148        | 129.299053                        | 0.0059868           |                                                                                                                                                                                             |
| 147        | 132.1039311                       | 0.00263116          |                                                                                                                                                                                             |
| 146        | 137.8602098                       | 0.0373124           |                                                                                                                                                                                             |
| <b>145</b> | <b>140.9170329</b>                | <b>0.77113656</b>   | 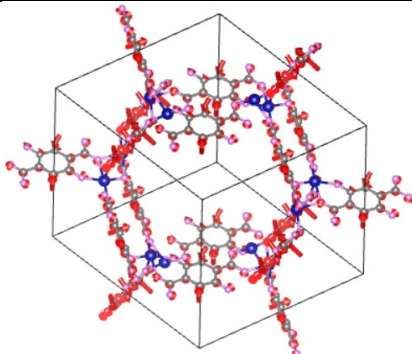 <p>Collective phonon mode in the linker region of 2,5-dioxido-1,4-benzenedicarboxylate and Co cage</p>  |
| 144        | 144.3471107                       | 0.05732724          |                                                                                                                                                                                             |
| <b>143</b> | <b>145.8934618</b>                | <b>0.66139796</b>   |  <p>Collective phonon mode in the linker region of 2,5-dioxido-1,4-benzenedicarboxylate and Co cage</p> |
| 142        | 149.0760778                       | 0.03494518          |                                                                                                                                                                                             |

|            |                  |                   |                                                                                                                                                                                           |
|------------|------------------|-------------------|-------------------------------------------------------------------------------------------------------------------------------------------------------------------------------------------|
| 141        | 152.1470209      | 0.00351805        |                                                                                                                                                                                           |
| 140        | 160.6784979      | 0.02548824        |                                                                                                                                                                                           |
| 139        | 164.8299145      | 2.0185E-05        |                                                                                                                                                                                           |
| 138        | 166.6137528      | 0.00039777        |                                                                                                                                                                                           |
| 137        | 168.04494        | 0.01179172        |                                                                                                                                                                                           |
| 136        | 171.8648899      | 0.00106051        |                                                                                                                                                                                           |
| 135        | 173.0560467      | 0.00260825        |                                                                                                                                                                                           |
| 134        | 186.610406       | 0.16500442        |                                                                                                                                                                                           |
| 133        | 189.0694765      | 0.02013146        |                                                                                                                                                                                           |
| <b>132</b> | <b>190.72775</b> | <b>0.74014256</b> | 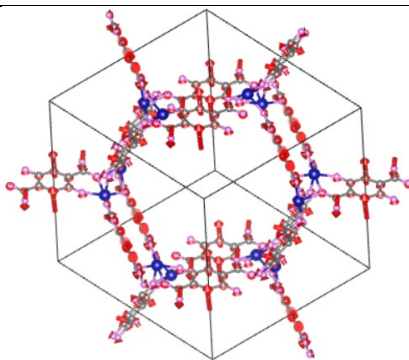 <p>Collective phonon mode in the linker region of 2,5-dioxido-1,4-benzenedicarboxylate and Co cage</p> |
| 131        | 196.5897263      | 0.00035129        |                                                                                                                                                                                           |
| 130        | 197.9043777      | 0.00362534        |                                                                                                                                                                                           |
| 129        | 201.4130482      | 0.00090381        |                                                                                                                                                                                           |
| 128        | 213.5747415      | 0.14371982        |                                                                                                                                                                                           |
| 127        | 214.2673285      | 0.15198421        |                                                                                                                                                                                           |
| 126        | 219.1595128      | 0.00409503        |                                                                                                                                                                                           |
| 125        | 228.0082435      | 5.5878E-05        |                                                                                                                                                                                           |
| 124        | 228.7329145      | 1.9708E-05        |                                                                                                                                                                                           |
| 123        | 231.1790553      | 0.00027637        |                                                                                                                                                                                           |
| 122        | 238.1140353      | 0.00376331        |                                                                                                                                                                                           |
| 121        | 239.2238757      | 0.0007933         |                                                                                                                                                                                           |
| 120        | 240.2491969      | 0.03903663        |                                                                                                                                                                                           |
| 119        | 250.2264717      | 0.00029656        |                                                                                                                                                                                           |
| 118        | 253.2930853      | 4.3278E-05        |                                                                                                                                                                                           |
| 117        | 260.7613821      | 0.09285504        |                                                                                                                                                                                           |
| 116        | 262.7475289      | 0.07043842        |                                                                                                                                                                                           |
| 115        | 269.6880722      | 0.00102128        |                                                                                                                                                                                           |

|     |             |            |                                                                                                                                                                 |
|-----|-------------|------------|-----------------------------------------------------------------------------------------------------------------------------------------------------------------|
| 114 | 278.9878413 | 0.45506196 | 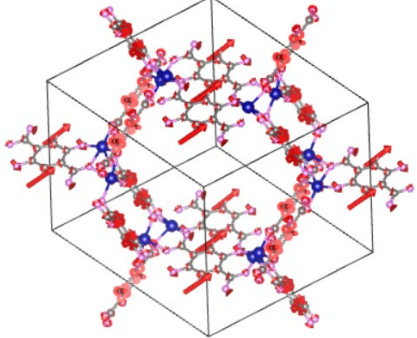 <p>Hexagonal pore-breathing mode along direction roughly parallel to c</p>   |
| 113 | 282.0713103 | 0.54689371 |  <p>Hexagonal pore-breathing mode along direction roughly parallel to a</p>   |
| 112 | 283.0122301 | 0.58574538 |  <p>Hexagonal pore-breathing mode along direction roughly parallel to b</p> |
| 111 | 291.9640663 | 0.27690577 |                                                                                                                                                                 |
| 110 | 327.4274555 | 0.03304656 |                                                                                                                                                                 |
| 109 | 330.3083384 | 0.04897022 |                                                                                                                                                                 |
| 108 | 345.1640134 | 2.6753E-05 |                                                                                                                                                                 |
| 107 | 349.5066209 | 8.1682E-05 |                                                                                                                                                                 |
| 106 | 350.898105  | 2.0596E-05 |                                                                                                                                                                 |
| 105 | 390.1670278 | 1.4173E-05 |                                                                                                                                                                 |
| 104 | 400.3509843 | 1.2651E-05 |                                                                                                                                                                 |
| 103 | 401.8061877 | 1.9481E-05 |                                                                                                                                                                 |

|           |                    |                   |                                                                                     |
|-----------|--------------------|-------------------|-------------------------------------------------------------------------------------|
| 102       | 424.3176284        | 2.3223E-06        |                                                                                     |
| 101       | 428.3215856        | 4.7593E-06        |                                                                                     |
| 100       | 428.8938086        | 7.6604E-07        |                                                                                     |
| 99        | 441.2558           | 0.03654387        |                                                                                     |
| 98        | 442.4308938        | 0.02554369        |                                                                                     |
| 97        | 444.6822588        | 0.16057142        |                                                                                     |
| 96        | 463.2107967        | 0.03036975        |                                                                                     |
| 95        | 464.0733175        | 0.02706189        |                                                                                     |
| 94        | 465.3791943        | 0.01061877        |                                                                                     |
| 93        | 480.1172231        | 2.4088E-05        |                                                                                     |
| 92        | 480.5267092        | 4.1668E-05        |                                                                                     |
| 91        | 482.0395739        | 1.7966E-06        |                                                                                     |
| <b>90</b> | <b>512.3093945</b> | <b>0.46347477</b> | 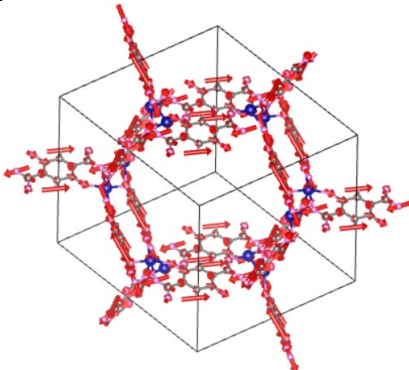 |
| 89        | 524.8130019        | 0.04158308        |                                                                                     |
| 88        | 526.2450205        | 0.04096185        |                                                                                     |
| 87        | 539.5446473        | 4.4614E-06        |                                                                                     |
| 86        | 544.9314226        | 5.5871E-06        |                                                                                     |
| 85        | 546.4718604        | 5.6393E-06        |                                                                                     |
| 84        | 560.4924639        | 0.03992793        |                                                                                     |
| 83        | 561.3216877        | 0.04395291        |                                                                                     |
| 82        | 562.784136         | 0.04732448        |                                                                                     |
| 81        | 615.0307296        | 0.01959397        |                                                                                     |
| 80        | 615.378708         | 0.03007678        |                                                                                     |
| 79        | 615.9224692        | 0.06909331        |                                                                                     |
| 78        | 641.9214497        | 3.1056E-05        |                                                                                     |
| 77        | 643.4500029        | 1.9164E-05        |                                                                                     |
| 76        | 644.159201         | 4.1789E-06        |                                                                                     |
| 75        | 689.073504         | 8.9084E-06        |                                                                                     |
| 74        | 689.4171028        | 1.6965E-06        |                                                                                     |
| 73        | 690.3225216        | 1.103E-06         |                                                                                     |
| 72        | 700.7047646        | 1.1481E-05        |                                                                                     |
| 71        | 701.17183          | 1.5245E-06        |                                                                                     |
| 70        | 702.2468544        | 1.2662E-05        |                                                                                     |
| 69        | 771.3168674        | 0.00018941        |                                                                                     |

|           |                    |                   |                                                                                      |
|-----------|--------------------|-------------------|--------------------------------------------------------------------------------------|
| 68        | 771.9617255        | 0.00014301        |                                                                                      |
| 67        | 772.3695414        | 1.057E-05         |                                                                                      |
| 66        | 776.730906         | 0.04983059        |                                                                                      |
| 65        | 777.4254908        | 0.12215373        |                                                                                      |
| 64        | 777.7473754        | 0.13014841        |                                                                                      |
| <b>63</b> | <b>784.8736862</b> | <b>0.73519214</b> | 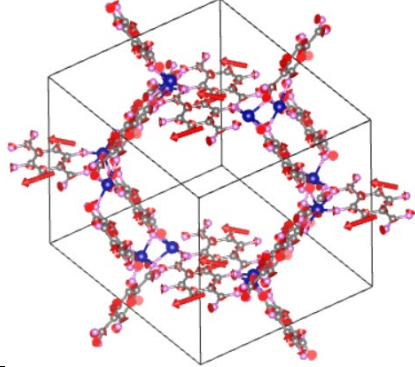   |
| 62        | 785.777905         | 0.26447609        |                                                                                      |
| <b>61</b> | <b>786.1087851</b> | <b>0.63153506</b> |   |
| 60        | 787.4017423        | 0.00854835        |                                                                                      |
| 59        | 787.8258914        | 0.02354002        |                                                                                      |
| 58        | 788.2615156        | 0.03660981        |                                                                                      |
| 57        | 854.2168142        | 0.25396803        |                                                                                      |
| 56        | 855.3892675        | 0.26197679        |                                                                                      |
| <b>55</b> | <b>859.4859207</b> | <b>0.39104733</b> |  |
| 54        | 917.7478858        | 0.00239153        |                                                                                      |
| 53        | 918.7753812        | 1.4507E-05        |                                                                                      |
| 52        | 919.1057471        | 5.0048E-05        |                                                                                      |
| 51        | 929.2373644        | 0.04158793        |                                                                                      |

|           |                   |                   |                                                                                      |
|-----------|-------------------|-------------------|--------------------------------------------------------------------------------------|
| 50        | 929.730912        | 0.0801139         |                                                                                      |
| 49        | 929.9957541       | 0.04814069        |                                                                                      |
| 48        | 1026.025598       | 8.9711E-06        |                                                                                      |
| 47        | 1031.937762       | 2.2011E-06        |                                                                                      |
| 46        | 1034.366474       | 3.1059E-06        |                                                                                      |
| 45        | 1100.798954       | 0.0120733         |                                                                                      |
| 44        | 1102.435467       | 0.0087699         |                                                                                      |
| 43        | 1103.368867       | 0.03854373        |                                                                                      |
| <b>42</b> | <b>1152.09021</b> | <b>0.94245142</b> | 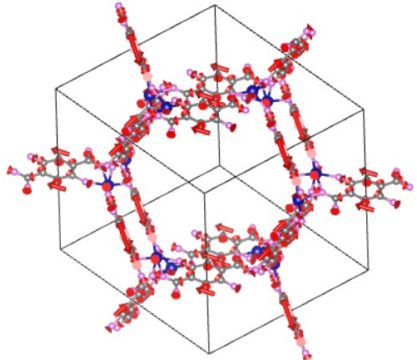   |
| 41        | 1155.829504       | 0.85835155        |   |
| 40        | 1156.89789        | 0.85621298        |  |
| 39        | 1206.968893       | 6.4677E-06        |                                                                                      |
| 38        | 1211.663155       | 1.9805E-06        |                                                                                      |
| 37        | 1213.951337       | 1.44E-05          |                                                                                      |
| 36        | 1223.702831       | 9.9918E-05        |                                                                                      |
| 35        | 1224.731752       | 3.4982E-05        |                                                                                      |
| 34        | 1225.248228       | 3.9363E-05        |                                                                                      |

|           |                    |                   |                                                                                                                                                                                                                                                                                                                                                                                                                                                                                                                           |
|-----------|--------------------|-------------------|---------------------------------------------------------------------------------------------------------------------------------------------------------------------------------------------------------------------------------------------------------------------------------------------------------------------------------------------------------------------------------------------------------------------------------------------------------------------------------------------------------------------------|
| 33        | 1235.002941        | 0.19508844        |                                                                                                                                                                                                                                                                                                                                                                                                                                                                                                                           |
| 32        | 1237.711398        | 0.19198975        |                                                                                                                                                                                                                                                                                                                                                                                                                                                                                                                           |
| 31        | 1240.006968        | 0.07085211        |                                                                                                                                                                                                                                                                                                                                                                                                                                                                                                                           |
| <b>30</b> | <b>1306.577472</b> | <b>0.59928488</b> | 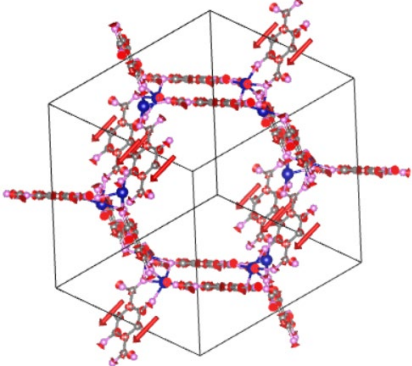 A ball-and-stick model of a complex organic molecule, likely a porphyrin derivative, shown within a 3D wireframe unit cell. The molecule features a central macrocyclic ring with four nitrogen atoms (blue) coordinated to a central metal atom (grey). Various side chains are attached to the ring, including methyl (red/white) and ethyl (red/white) groups, and a long aliphatic chain. The unit cell is a rectangular prism.    |
| 29        | 1309.872341        | 0.58636532        |  A ball-and-stick model of a complex organic molecule, similar to compound 30, shown within a 3D wireframe unit cell. The molecule features a central macrocyclic ring with four nitrogen atoms (blue) coordinated to a central metal atom (grey). Various side chains are attached to the ring, including methyl (red/white) and ethyl (red/white) groups, and a long aliphatic chain. The unit cell is a rectangular prism.          |
| 28        | 1312.404664        | 0.13789428        |                                                                                                                                                                                                                                                                                                                                                                                                                                                                                                                           |
| 27        | 1328.980588        | 2.1323E-05        |                                                                                                                                                                                                                                                                                                                                                                                                                                                                                                                           |
| 26        | 1333.211155        | 6.4583E-06        |                                                                                                                                                                                                                                                                                                                                                                                                                                                                                                                           |
| 25        | 1334.506104        | 7.0289E-06        |                                                                                                                                                                                                                                                                                                                                                                                                                                                                                                                           |
| <b>24</b> | <b>1346.296067</b> | <b>3.17709356</b> |  A ball-and-stick model of a complex organic molecule, similar to compounds 30 and 29, shown within a 3D wireframe unit cell. The molecule features a central macrocyclic ring with four nitrogen atoms (blue) coordinated to a central metal atom (grey). Various side chains are attached to the ring, including methyl (red/white) and ethyl (red/white) groups, and a long aliphatic chain. The unit cell is a rectangular prism. |



|    |             |            |                                                                                      |
|----|-------------|------------|--------------------------------------------------------------------------------------|
| 23 | 1348.400258 | 3.17263834 | 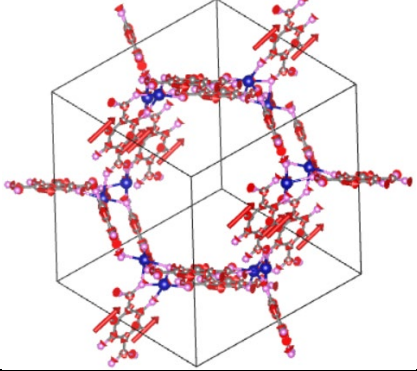   |
| 22 | 1365.325097 | 0.16075598 |                                                                                      |
| 21 | 1407.605362 | 0.0004109  |                                                                                      |
| 20 | 1409.080672 | 0.00059312 |                                                                                      |
| 19 | 1411.304765 | 0.00073915 |                                                                                      |
| 18 | 1414.86685  | 0.92654523 |   |
| 17 | 1416.719098 | 0.96448533 |  |
| 16 | 1420.867193 | 0.38798031 |  |

|    |             |            |                                                                                     |
|----|-------------|------------|-------------------------------------------------------------------------------------|
| 15 | 1432.087161 | 0.43863327 | 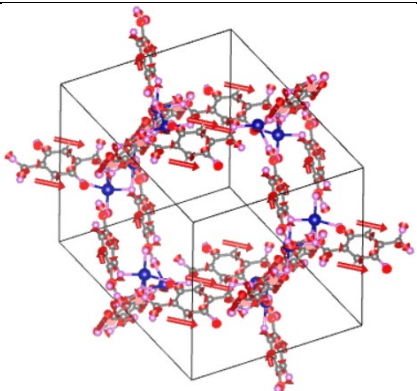  |
| 14 | 1433.636712 | 0.45077141 |   |
| 13 | 1439.847004 | 3.33615033 |  |
| 12 | 1460.57452  | 8.6558E-05 |                                                                                     |
| 11 | 1461.808465 | 1.103E-05  |                                                                                     |
| 10 | 1462.657805 | 1.7882E-05 |                                                                                     |
| 9  | 1549.54054  | 4.0843E-06 |                                                                                     |
| 8  | 1554.119932 | 5.2392E-07 |                                                                                     |
| 7  | 1554.92839  | 7.0647E-08 |                                                                                     |
| 6  | 3053.415928 | 0.00356806 |                                                                                     |
| 5  | 3054.106817 | 0.01619123 |                                                                                     |
| 4  | 3054.826529 | 0.00309442 |                                                                                     |
| 3  | 3055.353283 | 0.01715966 |                                                                                     |
| 2  | 3057.18507  | 0.00565089 |                                                                                     |
| 1  | 3057.970841 | 0.01380634 |                                                                                     |

**Table S2** Summary of Raman modes from plane wave density functional theory. The modes with a relatively strong calculated Raman activity ( $>10^6 \text{ \AA}^4/\text{amu}$ )<sup>2</sup> are shown in bold with the corresponding vibrational modes visualized by VESTA.<sup>1</sup>

| Mode       | Raman Frequency ( $\text{cm}^{-1}$ ) | Raman Activity ( $(\text{\AA}^4/\text{amu})$ ) | Raman modes                                                                           |
|------------|--------------------------------------|------------------------------------------------|---------------------------------------------------------------------------------------|
| 159        | 50.95853                             | 42.7831304                                     |                                                                                       |
| 158        | 73.17858                             | 3887.204694                                    |                                                                                       |
| 157        | 98.58957                             | 202511.4592                                    |                                                                                       |
| 156        | 102.24176                            | 3247.907912                                    |                                                                                       |
| 155        | 103.24998                            | 20462.881                                      |                                                                                       |
| 154        | 103.4844                             | 15758.0594                                     |                                                                                       |
| 153        | 104.12354                            | 11523.72665                                    |                                                                                       |
| 152        | 109.81798                            | 86.7702279                                     |                                                                                       |
| 151        | 120.27707                            | 803159.1367                                    |                                                                                       |
| 150        | 125.77558                            | 164.739671                                     |                                                                                       |
| 149        | 126.62085                            | 169.2136437                                    |                                                                                       |
| 148        | 135.03432                            | 27616.01482                                    |                                                                                       |
| 147        | 135.21377                            | 29023.21298                                    |                                                                                       |
| 146        | 136.19814                            | 2353.382596                                    |                                                                                       |
| 145        | 136.90995                            | 48541.76398                                    |                                                                                       |
| 144        | 142.21758                            | 683.0248445                                    |                                                                                       |
| 143        | 143.50259                            | 118.2224174                                    |                                                                                       |
| 142        | 148.1633                             | 48532.48694                                    |                                                                                       |
| 141        | 148.81738                            | 51212.89333                                    |                                                                                       |
| 140        | 161.95643                            | 166.0538464                                    |                                                                                       |
| 139        | 165.58783                            | 3911.004619                                    |                                                                                       |
| 138        | 165.80406                            | 1474.017168                                    |                                                                                       |
| 137        | 169.08246                            | 57965.34168                                    |                                                                                       |
| 136        | 169.3876                             | 78640.82615                                    |                                                                                       |
| <b>135</b> | <b>170.52264</b>                     | <b>1608492.005</b>                             | 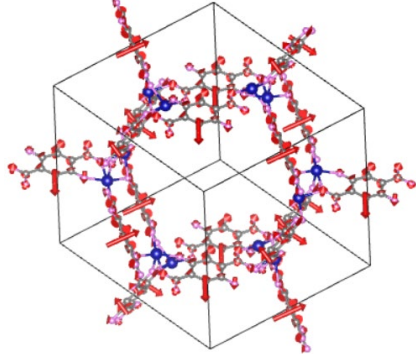 |
| 134        | 188.68781                            | 211.2982253                                    |                                                                                       |
| 133        | 189.02899                            | 342.8069268                                    |                                                                                       |
| 132        | 189.90438                            | 155.7508547                                    |                                                                                       |
| 131        | 197.52759                            | 36027.05748                                    |                                                                                       |
| 130        | 198.05931                            | 35969.13184                                    |                                                                                       |

|            |                  |                    |                                                                                     |
|------------|------------------|--------------------|-------------------------------------------------------------------------------------|
| 129        | 202.75072        | 744987.8808        |                                                                                     |
| 128        | 214.26762        | 235.0499693        |                                                                                     |
| 127        | 214.41285        | 1238.795329        |                                                                                     |
| 126        | 219.0457         | 155.0741647        |                                                                                     |
| 125        | 230.16836        | 176018.0944        |                                                                                     |
| 124        | 231.09404        | 151053.7682        |                                                                                     |
| <b>123</b> | <b>233.13055</b> | <b>9226783.319</b> | 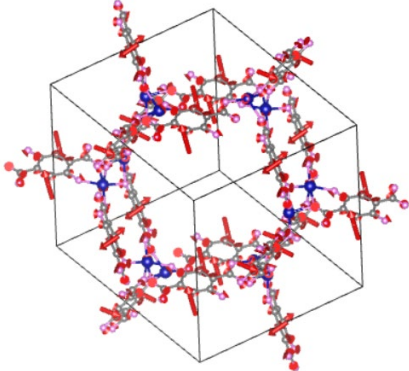 |
| 122        | 238.62626        | 35421.98101        |                                                                                     |
| 121        | 238.7555         | 42396.30289        |                                                                                     |
| 120        | 242.59832        | 2215.682524        |                                                                                     |
| 119        | 253.08179        | 69098.18137        |                                                                                     |
| 118        | 253.46529        | 75998.08353        |                                                                                     |
| 117        | 262.0922         | 226.0987004        |                                                                                     |
| 116        | 262.2039         | 265.7693703        |                                                                                     |
| 115        | 270.73772        | 273885.8532        |                                                                                     |
| 114        | 281.0877         | 145.2082119        |                                                                                     |
| 113        | 281.6534         | 56.5585057         |                                                                                     |
| 112        | 282.20258        | 138.6611465        |                                                                                     |
| 111        | 294.34856        | 48.4023262         |                                                                                     |
| 110        | 330.63864        | 171.8719926        |                                                                                     |
| 109        | 331.51394        | 92.6625941         |                                                                                     |
| 108        | 346.71451        | 43266.94373        |                                                                                     |
| 107        | 351.09553        | 48017.7061         |                                                                                     |
| 106        | 351.85849        | 44030.43389        |                                                                                     |
| 105        | 391.3746         | 9992.92782         |                                                                                     |
| 104        | 401.93752        | 45760.30137        |                                                                                     |
| 103        | 402.63196        | 42076.02375        |                                                                                     |

|            |                  |                    |                                                                                      |
|------------|------------------|--------------------|--------------------------------------------------------------------------------------|
| <b>102</b> | <b>425.02904</b> | <b>2528321.673</b> | 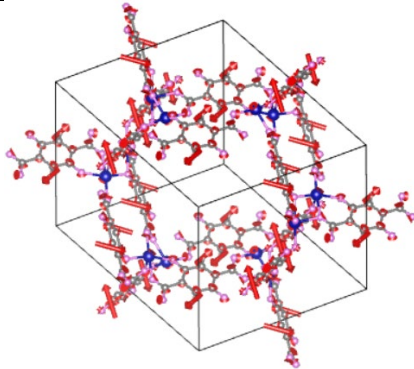  |
| 101        | 428.90642        | 111360.0438        |                                                                                      |
| 100        | 429.89606        | 100600.5836        |                                                                                      |
| 99         | 443.13279        | 286.0993106        |                                                                                      |
| 98         | 443.42612        | 230.3499826        |                                                                                      |
| 97         | 446.15729        | 475.8821067        |                                                                                      |
| 96         | 465.37264        | 1191.574368        |                                                                                      |
| 95         | 466.25512        | 650.437851         |                                                                                      |
| 94         | 466.92951        | 493.0047535        |                                                                                      |
| 93         | 480.88396        | 418355.4           |                                                                                      |
| 92         | 481.13723        | 186757.2088        |                                                                                      |
| <b>91</b>  | <b>481.89795</b> | <b>8040001.843</b> |  |
| 90         | 512.68457        | 160.7922822        |                                                                                      |
| 89         | 525.33486        | 198.478518         |                                                                                      |
| 88         | 526.16607        | 131.228375         |                                                                                      |
| 87         | 544.35796        | 364688.1038        |                                                                                      |
| 86         | 545.84206        | 105419.4683        |                                                                                      |
| 85         | 546.28189        | 95571.34593        |                                                                                      |
| 84         | 561.80799        | 132.3148946        |                                                                                      |
| 83         | 562.00872        | 199.8426764        |                                                                                      |
| 82         | 562.16254        | 70.5249201         |                                                                                      |
| 81         | 615.1113         | 369.6392695        |                                                                                      |
| 80         | 615.37354        | 253.8918785        |                                                                                      |
| 79         | 615.84745        | 55.9145654         |                                                                                      |
| 78         | 642.76403        | 7054.147573        |                                                                                      |
| 77         | 643.30051        | 26687.88784        |                                                                                      |

|    |            |             |  |
|----|------------|-------------|--|
| 76 | 643.4371   | 25030.19134 |  |
| 75 | 689.30105  | 8466.157443 |  |
| 74 | 689.77596  | 16903.28135 |  |
| 73 | 690.64667  | 177759.2437 |  |
| 72 | 700.42075  | 34718.93275 |  |
| 71 | 700.95926  | 37378.27357 |  |
| 70 | 701.95807  | 99815.40539 |  |
| 69 | 771.73576  | 21657.36065 |  |
| 68 | 771.88862  | 25670.08836 |  |
| 67 | 772.1635   | 26158.12347 |  |
| 66 | 776.77393  | 225.8398847 |  |
| 65 | 777.34586  | 283.1309266 |  |
| 64 | 777.41232  | 195.6024403 |  |
| 63 | 785.17597  | 6263.907045 |  |
| 62 | 785.56341  | 95584.00084 |  |
| 61 | 785.72316  | 915087.545  |  |
| 60 | 787.05624  | 54787.54537 |  |
| 59 | 787.42345  | 35120.22936 |  |
| 58 | 788.38379  | 3896.036962 |  |
| 57 | 853.77157  | 359.2667489 |  |
| 56 | 854.53921  | 168.7127147 |  |
| 55 | 858.44004  | 53.5609775  |  |
| 54 | 916.86579  | 7055.741258 |  |
| 53 | 918.10122  | 4037.701584 |  |
| 52 | 920.02356  | 4593.765313 |  |
| 51 | 927.55036  | 281.3558127 |  |
| 50 | 928.31148  | 331.9314569 |  |
| 49 | 930.33125  | 557.7970704 |  |
| 48 | 1026.3432  | 259189.1511 |  |
| 47 | 1031.17742 | 32614.79259 |  |
| 46 | 1032.87649 | 14623.64345 |  |
| 45 | 1100.67015 | 708.554544  |  |
| 44 | 1101.09373 | 527.2214478 |  |
| 43 | 1101.6371  | 431.039719  |  |
| 42 | 1150.65368 | 293.4883208 |  |
| 41 | 1153.08135 | 140.8100342 |  |
| 40 | 1154.50869 | 298.3985869 |  |

|    |            |             |                                                                                       |
|----|------------|-------------|---------------------------------------------------------------------------------------|
| 39 | 1207.63837 | 8302132.835 | 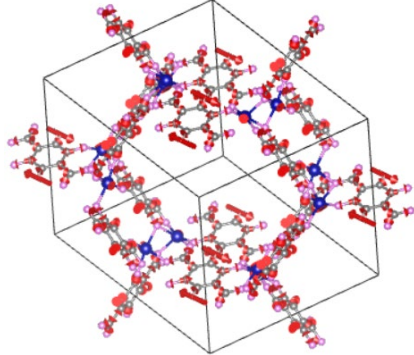   |
| 38 | 1211.16864 | 4768434.303 |    |
| 37 | 1212.37203 | 844427.0546 |                                                                                       |
| 36 | 1221.81625 | 154645.2011 |                                                                                       |
| 35 | 1222.38802 | 29443.59646 |                                                                                       |
| 34 | 1223.14816 | 84175.46879 |                                                                                       |
| 33 | 1235.02472 | 288.6190655 |                                                                                       |
| 32 | 1237.38016 | 116.8987354 |                                                                                       |
| 31 | 1238.33202 | 498.0149254 |                                                                                       |
| 30 | 1306.15933 | 156.5192937 |                                                                                       |
| 29 | 1309.01271 | 195.6929275 |                                                                                       |
| 28 | 1310.71262 | 303.3481649 |                                                                                       |
| 27 | 1327.42885 | 729937.7742 |                                                                                       |
| 26 | 1329.81471 | 739365.4503 |                                                                                       |
| 25 | 1333.25766 | 4192678.448 |  |
| 24 | 1344.82829 | 204.0789085 |                                                                                       |
| 23 | 1346.83248 | 475.963979  |                                                                                       |
| 22 | 1361.5288  | 39.9315138  |                                                                                       |

|    |            |             |                                                                                      |
|----|------------|-------------|--------------------------------------------------------------------------------------|
| 21 | 1407.99711 | 1146712.492 | 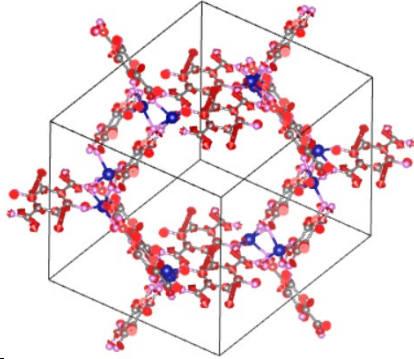  |
| 20 | 1408.99841 | 1159093.897 |   |
| 19 | 1411.23321 | 3723156.955 |  |
| 18 | 1413.53909 | 3594.596947 |                                                                                      |
| 17 | 1415.36005 | 2275.814781 |                                                                                      |
| 16 | 1418.77438 | 78.3495954  |                                                                                      |
| 15 | 1431.98043 | 214.7232618 |                                                                                      |
| 14 | 1433.28525 | 268.2464918 |                                                                                      |
| 13 | 1439.92207 | 91.3383666  |                                                                                      |



|    |            |             |                                                                                      |
|----|------------|-------------|--------------------------------------------------------------------------------------|
| 12 | 1460.98531 | 5787329.071 | 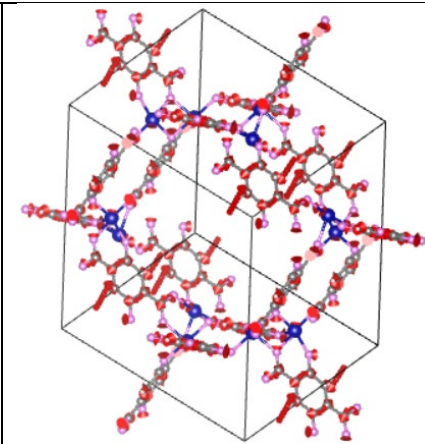   |
| 11 | 1461.88864 | 5101940.907 |    |
| 10 | 1462.58582 | 4757345.728 |   |
| 9  | 1549.56485 | 1090728.326 |  |

|   |            |             |                                                                                     |
|---|------------|-------------|-------------------------------------------------------------------------------------|
| 8 | 1553.53556 | 988088.2523 | 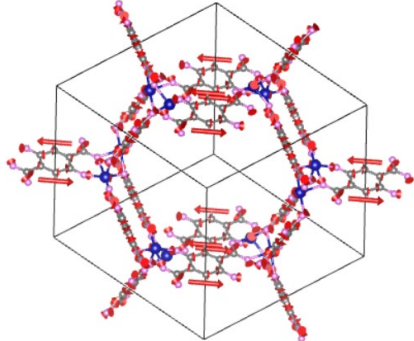 |
| 7 | 1554.63132 | 1603107.296 |  |
| 6 | 3042.01987 | 592.6514989 |                                                                                     |
| 5 | 3042.70778 | 305.977155  |                                                                                     |
| 4 | 3045.42092 | 1189.599409 |                                                                                     |
| 3 | 3047.86847 | 767.5525217 |                                                                                     |

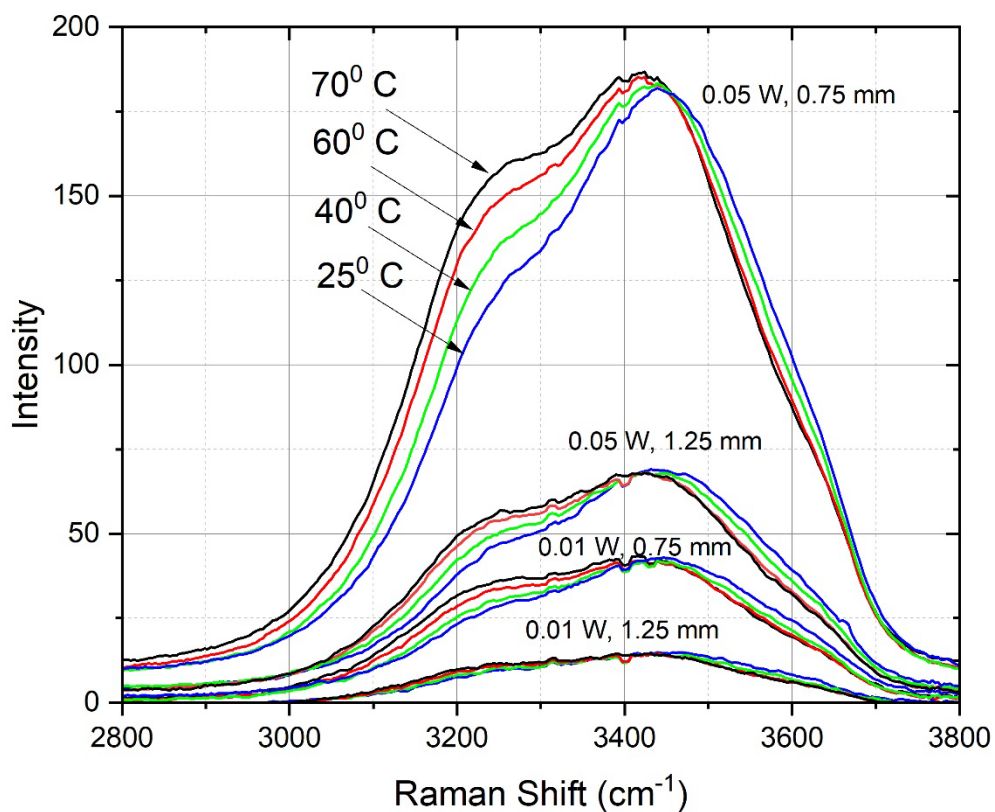

**Figure S1** Raman spectroscopy of water in capillary under different laser focusing and power conditions marked in figure. Distance denoted is between capillary and focusing lens.

Smith et al.<sup>3</sup> has performed Raman thermometry from liquid water droplets to determine the temperature, since the OH stretch frequencies are very sensitive to temperature between 3000-3800  $\text{cm}^{-1}$ . The capillary was filled with water and the heater temperature adjusted to four temperatures. Upon comparison to the Smith et al. data, we build an effective temperature scale for our reactor based on the four measurements shown in Figure S1.

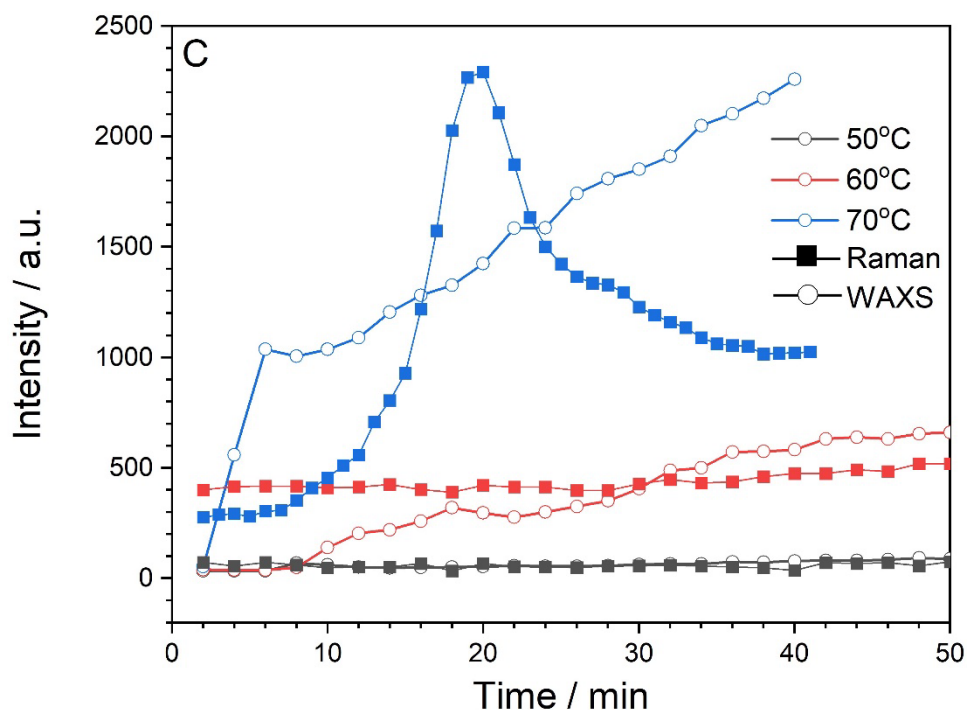

**Figure S2. WAXS and Raman kinetic traces at heater temperature of 50, 60 and 70 °C.** The WAXS kinetic traces are tracking the peak at  $0.5 \text{ \AA}^{-1}$ , and the Raman kinetic traces are tracking the peak at  $1278 \text{ cm}^{-1}$ .

**WAXS and Raman kinetics:** To trace the growth kinetics from the WAXS and Raman spectra, shown in Figure 3A and B, we plotted the time dependence of signal,  $0.5 \text{ \AA}^{-1}$  for WAXS, and the in-plane C-H bending mode intensity ( $1278 \text{ cm}^{-1}$ ) for Raman at three temperatures, 50, 60 and 70 °C. At a qualitative level, the signal shows a dependence on temperature, there is no discernable reaction at 50 °C, for the WAXS data at 60 °C there is a rise of signal at around the 8 min interval that gradually increases, while the signal at 70 °C is dramatic for WAXS with an onset around 2 minute and then plateaus at around the 6 min mark, and then continues to increase at a less rapid rate. The 70 °C signal from the Raman spectra is not so dramatic, with an onset around the 6 min mark, and then a rapid rise at the 10-minute mark, followed by depletion of signal around 20 minutes.

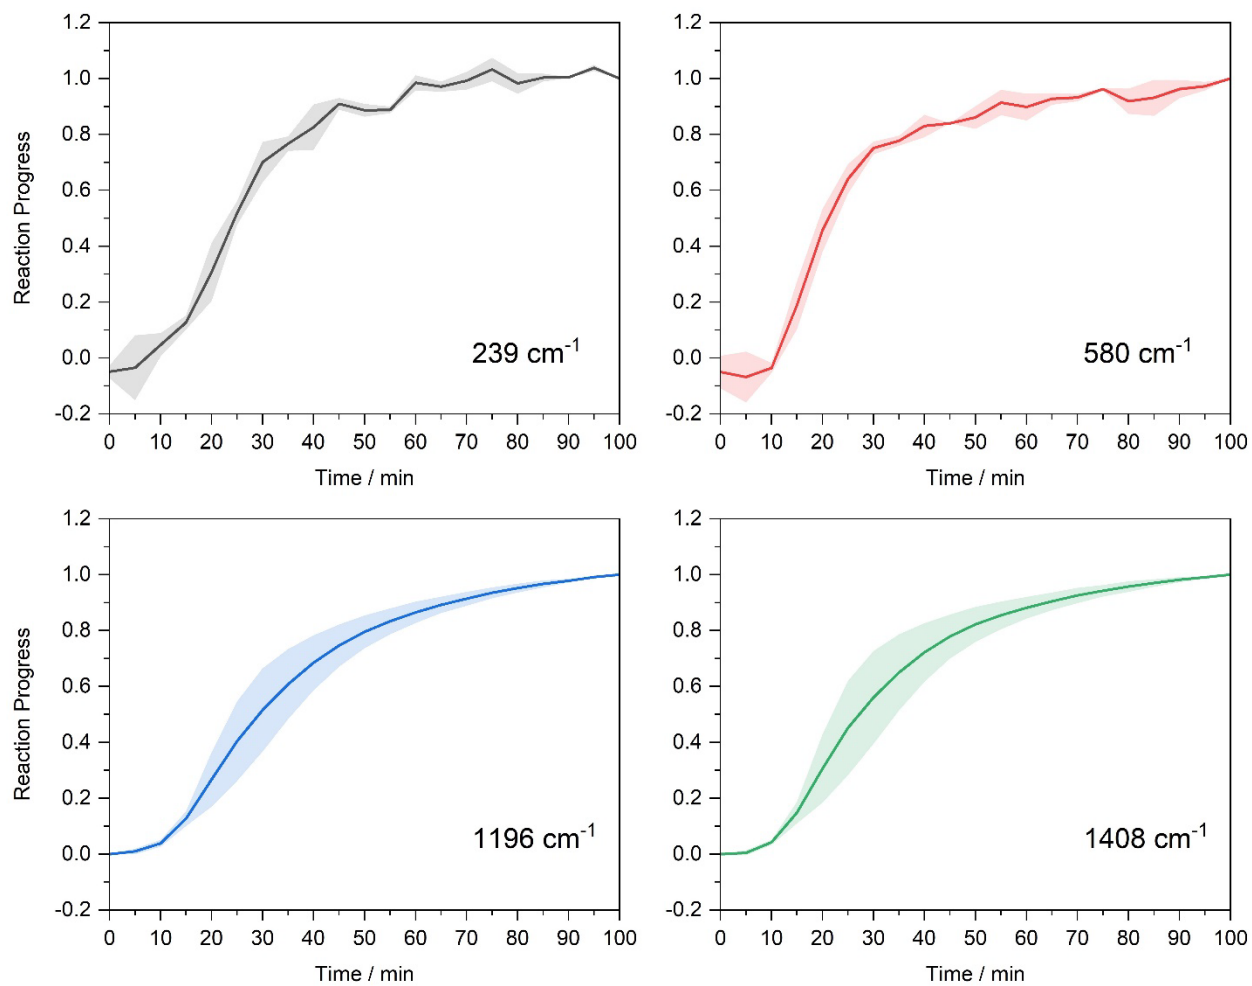

**Figure S3** Errors of the MOF synthesis kinetics of 60°C measured by FIR and MIR at 239, 580, 1196 and 1480 cm<sup>-1</sup> from a set of three measurements.

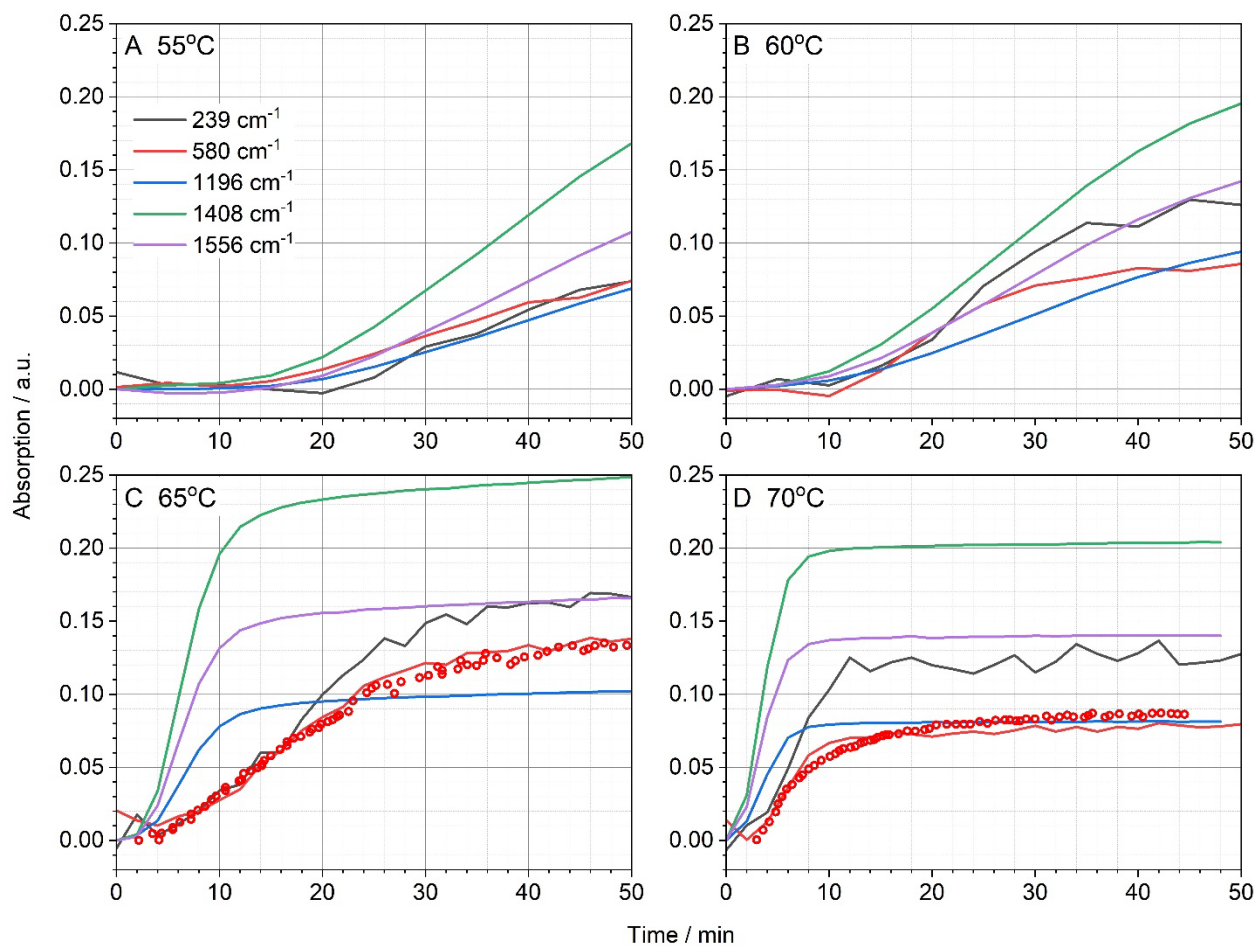

**Figure S4** Absorption intensity of five FIR and MIR peaks as a function of time at temperatures of (A) 55 °C, (B) 60 °C, (C) 65 °C, (D) 70 °C. Black Line: 239 cm<sup>-1</sup>, red line: 580 cm<sup>-1</sup>, blue line 1196 cm<sup>-1</sup>, Green line: 1408 cm<sup>-1</sup>, magenta line: 1566 cm<sup>-1</sup>. The red symbols in (C) and (D) are digitized data of X-Ray diffraction measurements of Co-MOF growth at 70 °C and 80 °C respectively from Osta et al.<sup>4</sup>

**Table S3** Gualtieri model fitted kinetic parameters for the reaction traced by ATR-FTIR absorption intensity of 239, 580, 1196, 1408, and 1556  $\text{cm}^{-1}$ .

| <b>239 <math>\text{cm}^{-1}</math></b> | 55°C     | 60°C     | 65°C     | 70°C | 75°C     |
|----------------------------------------|----------|----------|----------|------|----------|
| <i>a</i>                               | 35       | 23       | 13       | 5    | 3.8      |
| <i>b</i>                               | 7        | 5        | 5        | 1.5  | 0.8      |
| <i>k<sub>g</sub></i>                   | 0.02     | 0.05     | 0.06     | 0.17 | 0.42     |
| <i>k<sub>n</sub></i>                   | 0.028571 | 0.043478 | 0.076923 | 0.2  | 0.263158 |

| <b>580 <math>\text{cm}^{-1}</math></b> | 55°C | 60°C     | 65°C     | 70°C | 75°C     |
|----------------------------------------|------|----------|----------|------|----------|
| <i>a</i>                               | 25   | 17       | 11       | 5    | 2.8      |
| <i>b</i>                               | 7    | 5.5      | 5        | 1    | 0.6      |
| <i>k<sub>g</sub></i>                   | 0.02 | 0.05     | 0.06     | 0.17 | 0.42     |
| <i>k<sub>n</sub></i>                   | 0.04 | 0.058824 | 0.090909 | 0.2  | 0.357143 |

| <b>1196 <math>\text{cm}^{-1}</math></b> | 55°C     | 60°C     | 65°C | 70°C     | 75°C |
|-----------------------------------------|----------|----------|------|----------|------|
| <i>a</i>                                | 36       | 26       | 5    | 3.6      | 4    |
| <i>b</i>                                | 11       | 10       | 1.6  | 0.8      | 2    |
| <i>k<sub>g</sub></i>                    | 0.018    | 0.036    | 0.14 | 0.4      | 0.35 |
| <i>k<sub>n</sub></i>                    | 0.027778 | 0.038462 | 0.2  | 0.277778 | 0.25 |

| <b>1408 <math>\text{cm}^{-1}</math></b> | 55°C     | 60°C  | 65°C | 70°C     | 75°C |
|-----------------------------------------|----------|-------|------|----------|------|
| <i>a</i>                                | 34       | 25    | 5    | 3.6      | 4    |
| <i>b</i>                                | 12       | 11    | 1.3  | 0.8      | 2    |
| <i>k<sub>g</sub></i>                    | 0.02     | 0.039 | 0.15 | 0.4      | 0.45 |
| <i>k<sub>n</sub></i>                    | 0.029412 | 0.04  | 0.2  | 0.277778 | 0.25 |

| <b>1556 <math>\text{cm}^{-1}</math></b> | 55°C     | 60°C  | 65°C | 70°C     | 75°C |
|-----------------------------------------|----------|-------|------|----------|------|
| <i>a</i>                                | 37       | 25    | 5    | 3        | 4    |
| <i>b</i>                                | 12       | 11    | 1.3  | 0.8      | 2    |
| <i>k<sub>g</sub></i>                    | 0.02     | 0.039 | 0.15 | 0.4      | 0.45 |
| <i>k<sub>n</sub></i>                    | 0.027027 | 0.04  | 0.2  | 0.333333 | 0.25 |

The Gualtieri model fitting resulted in different kinetic parameter sets for each wavenumber. In FIR region, the two wavenumbers, 239 (hexagonal pore-breathing mode) and 580  $\text{cm}^{-1}$  (Co-O stretching) have similar kinetic parameters showing the nucleation kinetics starting from the cobalt core. The other three wavenumbers, 1196, 1408, and 1556  $\text{cm}^{-1}$  in MIR region correspond to the growth kinetics of the skeleton and share similar kinetic parameters. Such facts indicate that the formation of Co-O bonds plays a central role in the nucleation process and determines the overall reaction rate, whereas the formation of ligand skeletons is more sensitive to the temperature change and becomes temperature-independent above 70°C.

## References:

1. K. Momma and F. Izumi, *Journal of Applied Crystallography*, 2011, **44**, 1272-1276.
2. J. Neugebauer, M. Reiher, C. Kind and B. A. Hess, *Journal of Computational Chemistry*, 2002, **23**, 895-910.
3. J. D. Smith, C. D. Cappa, W. S. Drisdell, R. C. Cohen and R. J. Saykally, *J Am Chem Soc*, 2006, **128**, 12892-12898.
4. R. El Osta, M. Feyand, N. Stock, F. Millange and R. I. Walton, *Powder Diffraction*, 2013, **28**, S256-S275.
